# Supplementary material for: Thermal transport properties of novel two-dimensional CSe
Source: Royal Society of Chemistry journal article supplement (doi:10.1039/d0cp02298e), 2020-01-01
Supplement: d0cp02298e1.pdf [file d0cp02298e1.pdf]

## Supplementary Information

# Thermal transport properties of novel two-dimensional CSe

Bing Lv<sup>a,b</sup>, Xiaona Hu<sup>c</sup>, Xuefei Liu<sup>a,b</sup>, Zhaofu Zhang<sup>d</sup>, Jia Song<sup>e</sup>,  
Zijiang Luo<sup>f</sup>, and Zhibin Gao<sup>\*g</sup>

<sup>a</sup> College of Physics and Electronic science, Guizhou Normal University, Guiyang 550025, China.

<sup>b</sup> Key Laboratory of Low Dimensional Condensed Matter Physics of Higher Educational Institution of Guizhou Province, Guizhou Normal University, Guiyang 550025, China.

<sup>c</sup> School of Biological Sciences, Guizhou Education University, Guiyang 550018, China.

<sup>d</sup> Department of Engineering, Cambridge University, Cambridge, CB2 1PZ, United Kingdom.

<sup>e</sup> Shanghai Engineering Research Center of 3D Printing Materials, Shanghai Research Institute of Materials, Shanghai 200437, China.

<sup>f</sup> School of Information, Guizhou University of Finance and Economics, Guiyang 550025, China.

<sup>g</sup> Department of Physics, National University of Singapore, Singapore 117551, Republic of Singapore.

E-mail: [zhibin.gao@nus.edu.sg](mailto:zhibin.gao@nus.edu.sg)

### Contents :

Fig. S1: The convergence tests of  $\kappa_{\text{lat}}$  for RTA and iterative solution with different q-grid at 300 K.

Fig. S2: The convergence tests of  $\kappa_{\text{lat}}$  for different scale broadening parameters with 200x200x1 q-grid at 300 K

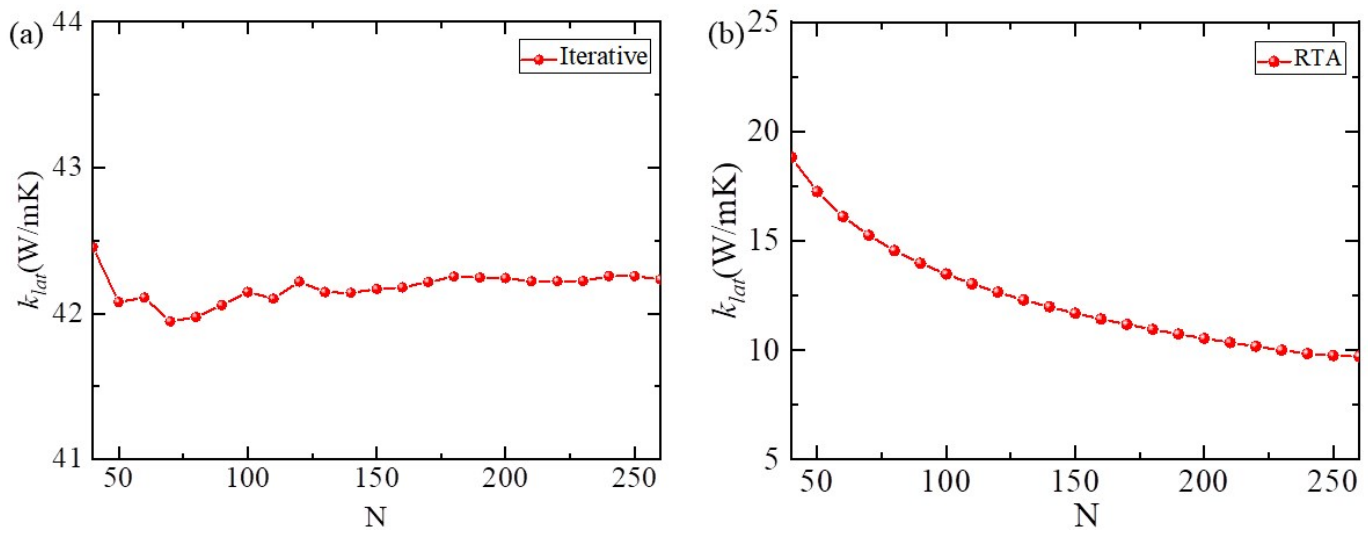

Fig. S1: (a) The convergence tests of  $\kappa_{lat}$  for the iterative solution with different q-grid at 300 K. (b) The convergence tests of  $\kappa_{lat}$  for RTA solution with different q-grid at 300 K.

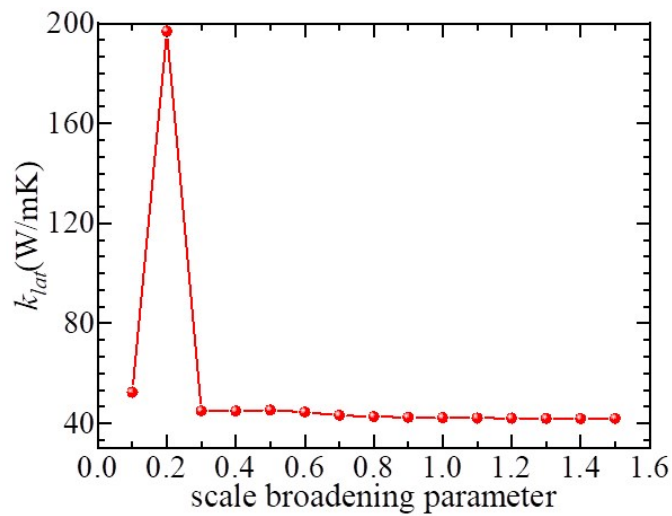

Fig. S2: The convergence tests of  $\kappa_{lat}$  for different scale broadening parameters with 200x200x1 q-grid at 300 K.
